# Supplementary material for: Study of adsorption-oxidative degradation of PAHs over organic–inorganic hybrid layered double hydroxides
Source: Royal Society of Chemistry journal article supplement (doi:10.1039/d3nj04805e), 2023-12-11
Supplement: d3nj04805e1.pdf [file d3nj04805e1.pdf]

## Supplementary Information

# Study of Adsorption-Oxidative Degradation for PAHs over Organic- Inorganic hybrid layered hydrotalcite

Huimin Zhang<sup>a</sup>, Jinhua Liang<sup>b,\*</sup>, Yang Xu<sup>a</sup>, Yitao Gu<sup>b</sup>, Tianyi Yang<sup>a</sup>, Chaofei Peng<sup>a</sup>  
and Prof. Xiaoqian Ren<sup>a,\*</sup>

<sup>a</sup> *College of Chemistry and Chemical Engineering, Nanjing Tech University, Nanjing China, 211816*

<sup>b</sup> *College of Biotechnology and Pharmaceutical Engineering, Nanjing Tech University, Nanjing China, 211816,*

<sup>†</sup> *Electronic supplementary information (ESI) available.*

Corresponding authors:

Tel.: +86 18915906233 (Xiaoqian Ren); +86 13770598601 (Jinhua Liang).

*E-mail address:* xqren@njtech.edu.cn (Xiaoqian Ren); jhliang@njtech.edu.cn (Jinhua Liang).

## **Contents**

**Fig. S1.** Standard curve of Nap and PA.

**Fig. S2.** N<sub>2</sub> adsorption/desorption isotherm of catalysts (a) and Pore size distribution curves (b).

**Fig. S3.** Degradation of Nap and PA

(a) Nap oxidized by H<sub>2</sub>O<sub>2</sub>; (b) Nap oxidized by Na<sub>2</sub>S<sub>2</sub>O<sub>8</sub>; (c) Nap oxidized by O<sub>3</sub>;

(d) PA oxidized by H<sub>2</sub>O<sub>2</sub>; (e) PA oxidized by Na<sub>2</sub>S<sub>2</sub>O<sub>8</sub>; (f) PA oxidized by O<sub>3</sub>.

**Fig. S4.** Pseudo-first-order kinetic equation for catalytic degradation of Nap and PA

(a) Nap oxidized by H<sub>2</sub>O<sub>2</sub>; (b) Nap oxidized by Na<sub>2</sub>S<sub>2</sub>O<sub>8</sub>; (c) Nap oxidized by O<sub>3</sub>;

(d) PA oxidized by H<sub>2</sub>O<sub>2</sub>; (e) PA oxidized by Na<sub>2</sub>S<sub>2</sub>O<sub>8</sub>; (f) PA oxidized by O<sub>3</sub>.

**Sch. S1.** Degradation mass spectrometry (a) Nap and (b) PA.

## Method of measurement of ozone concentration:

The determination mechanism is that the strong oxidant ozone reacts with aqueous solution of potassium iodide to produce free iodine, and the ozone is reduced to oxygen, which makes the free iodine appear in color. Starch is used as an indicator, and the reaction between free iodine and starch appears blue and purple. A certain concentration of sodium thiosulfate solution is used for titration. The reaction equation is as follows: Eq. 1 and Eq. 2:

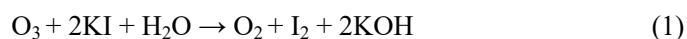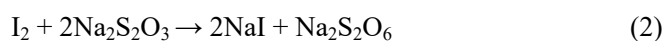

According to the standard curve was obtained by regression (shown in **Fig. S1**),

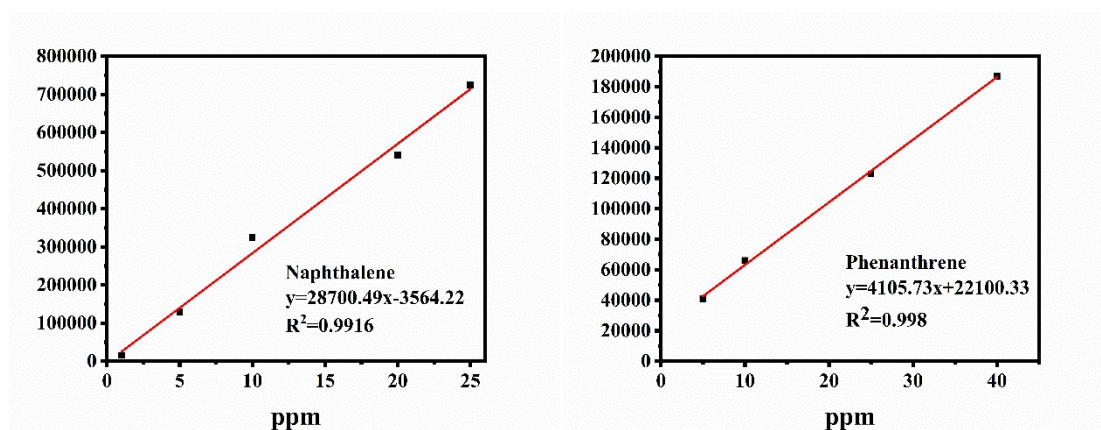

**Fig. S1.** Standard curve of Nap and PA.

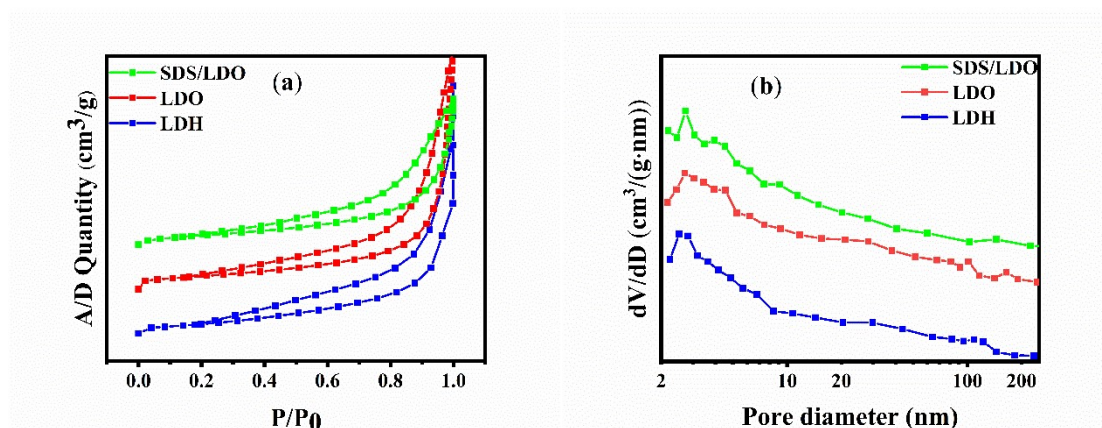

**Fig. S2.**  $N_2$  adsorption/desorption isotherm of catalysts (a) and Pore size distribution curves (b).

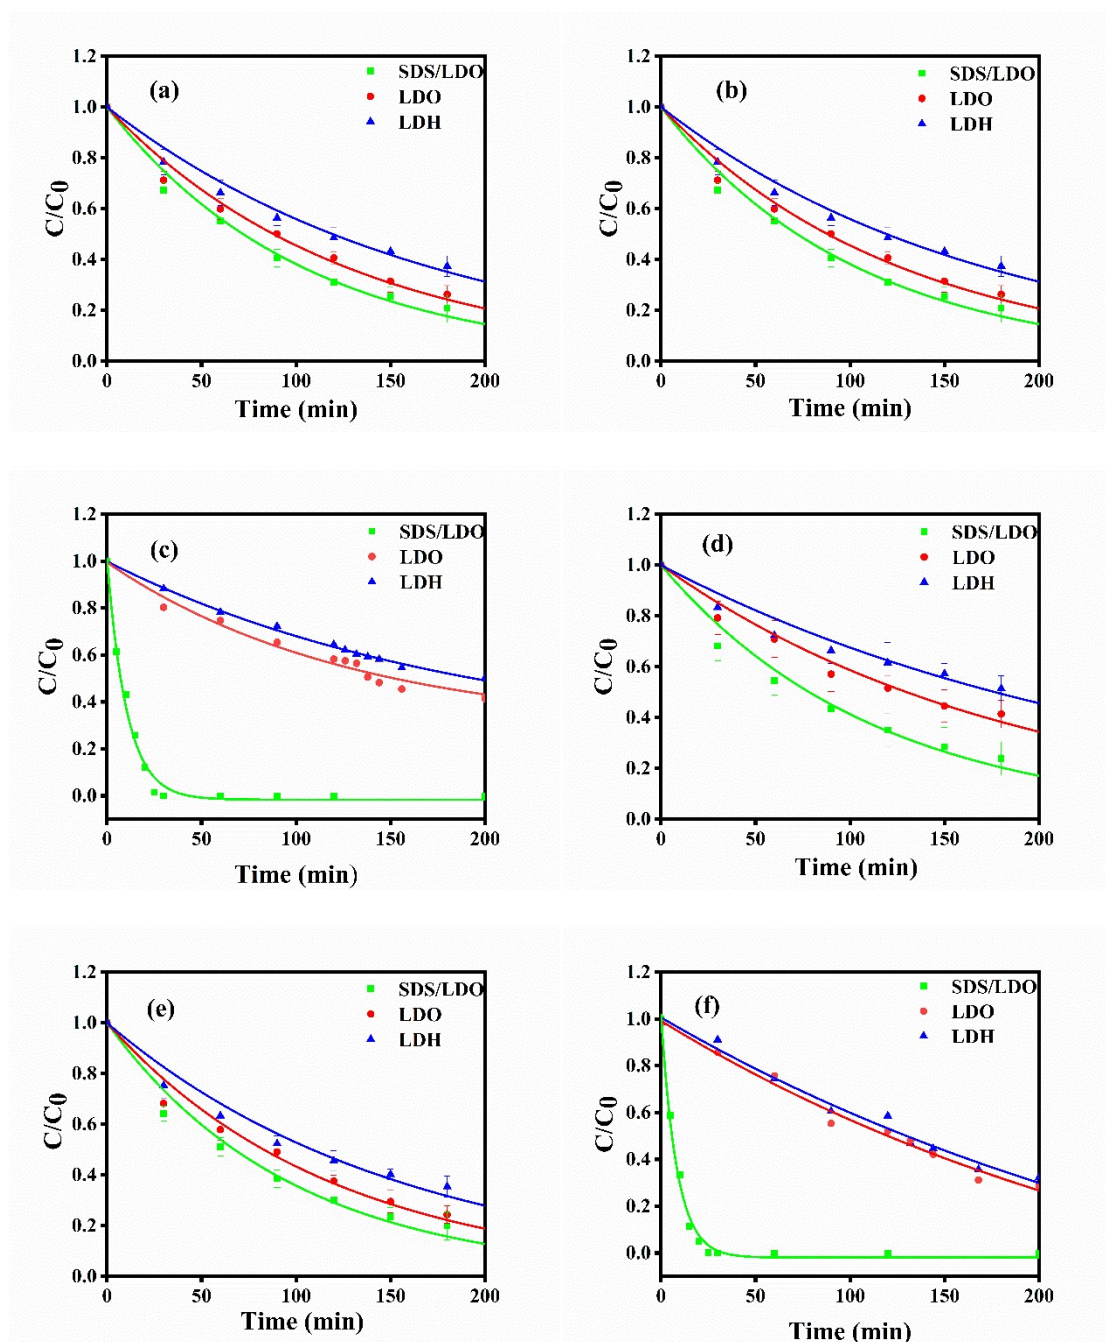

**Fig. S3.** Degradation of Nap and PA

(a) Nap oxidized by  $H_2O_2$ ; (b) Nap oxidized by  $Na_2S_2O_8$ ; (c) Nap oxidized by  $O_3$ ;  
 (d) PA oxidized by  $H_2O_2$ ; (e) PA oxidized by  $Na_2S_2O_8$ ; (f) PA oxidized by  $O_3$ .

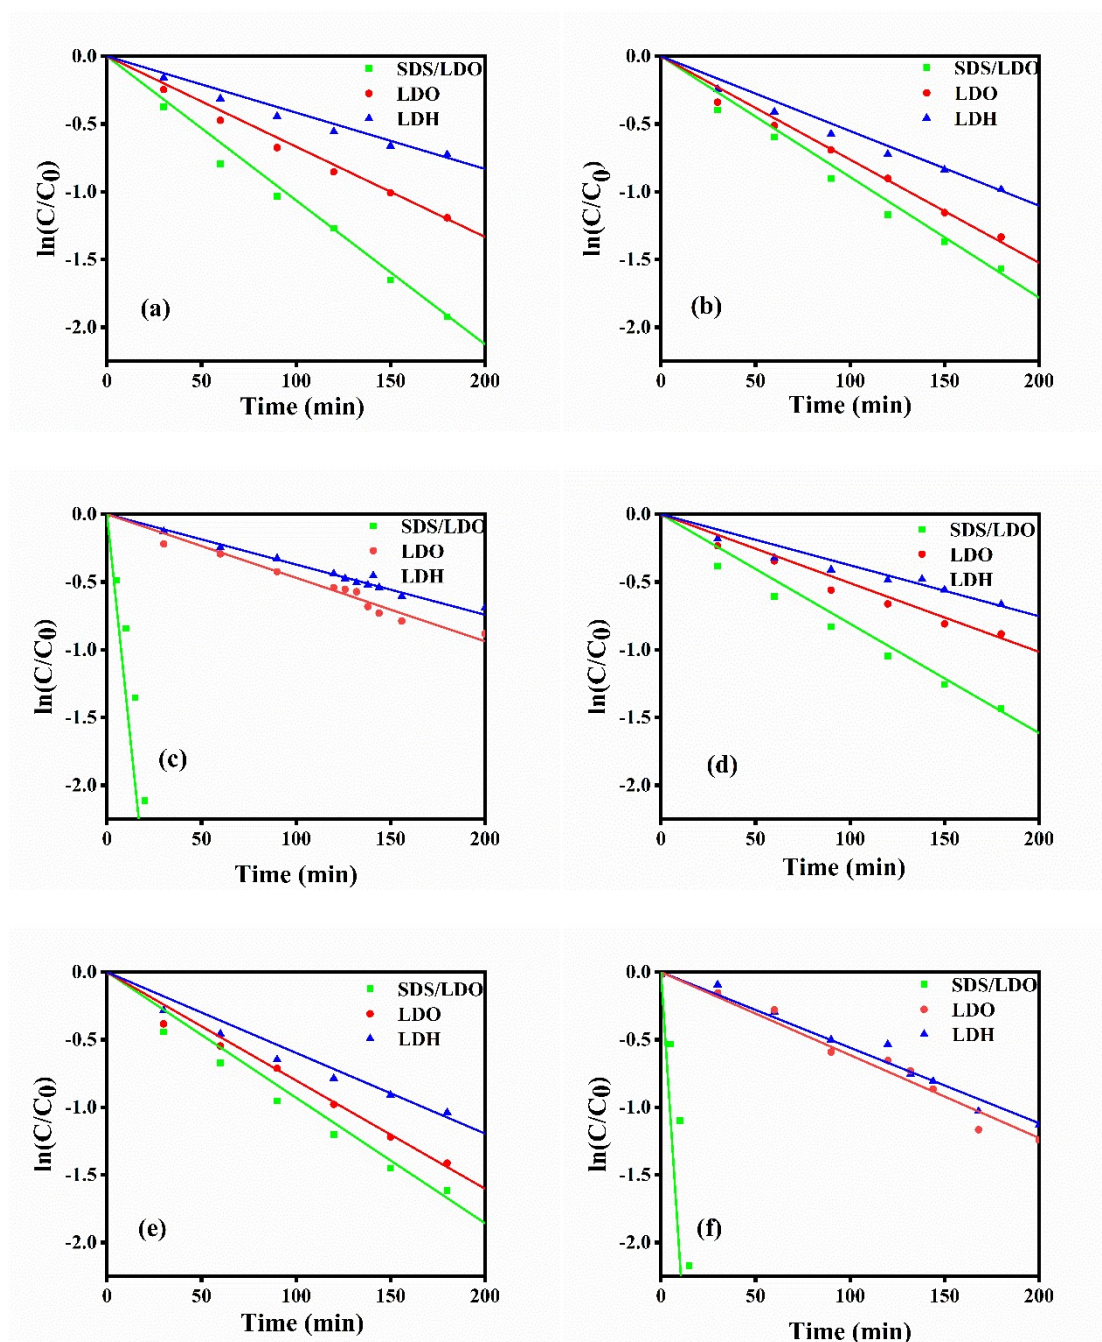

**Fig. S4.** Pseudo-first-order kinetic equation for catalytic degradation of Nap and PA  
 (a) Nap oxidized by  $H_2O_2$ ; (b) Nap oxidized by  $Na_2S_2O_8$ ; (c) Nap oxidized by  $O_3$ ;  
 (d) PA oxidized by  $H_2O_2$ ; (e) PA oxidized by  $Na_2S_2O_8$ ; (f) PA oxidized by  $O_3$ .

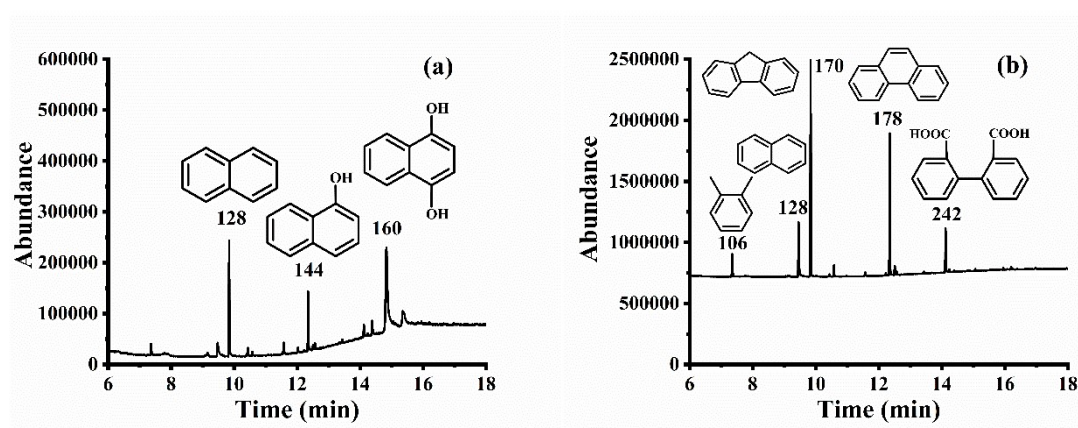

Sch. S1. Degradation mass spectrometry (a) Nap and (b) PA.
